# Supplementary material for: Excellent regeneration, easy separation and high capacity of 3D chitosan–melamine sponge composites for anionic dye removal
Source: Royal Society of Chemistry journal article supplement (doi:10.1039/d2nj05954a), 2023-01-01
Supplement: d2nj05954a1.pdf [file d2nj05954a1.pdf]

## Supplementary material

### A list of figure and tables

**Table S1** BET parameters of the pristine MS and CTS-MS composite.

**Table S2** Comparison of the maximum adsorption capacity of OII onto various adsorbents.

**Table S3** Kinetics model correlation coefficient for OII adsorption on CTS-MS composite at different temperatures.

**Fig. S1.** Nitrogen adsorption-desorption isotherms of MS.

**Fig. S2.** BJH pore size distribution of MS.

**Fig. S3.** Effect of contact time on adsorption of different concentrations of OII by CTS-MS composite.

**Fig. S4.** The pseudo-first-order kinetics linear fitting under different temperature conditions (220 mg/L; 100 mL; pH 3; 58 mg dosage; 360 min).

**Fig. S5.** The pseudo-second-order kinetics linear fitting under different temperature conditions (220 mg/L; 100 mL; pH 3; 58 mg dosage; 360 min).

**Fig. S6.** The intra-particle kinetics linear fitting under different temperature conditions (220 mg/L; 100 mL; pH 3; 58 mg dosage; 360 min).

**Table S1** BET parameters of the pristine MS and CTS-MS composite.

| <b>Sample</b> | <b>Surface area (m<sup>2</sup>/g)</b> | <b>Pore volume (cm<sup>3</sup>/g)</b> | <b>Average pore diameter (nm)</b> |
|---------------|---------------------------------------|---------------------------------------|-----------------------------------|
| MS            | 8.697                                 | 0.007938                              | 3.818                             |
| CTS-MS        | 5.855                                 | 0.008705                              | 3.052                             |

**Table S2** Comparison of the maximum adsorption capacity of OII onto various adsorbents.

| <b>Adsorbents</b>                                                  | <b>pH</b> | <b><math>q_m</math>(mg/g)</b> | <b>References</b> |
|--------------------------------------------------------------------|-----------|-------------------------------|-------------------|
| LDH/PEG                                                            | 6.2       | 625                           | 41                |
| PANI/FeOOH                                                         | 3         | 155.8                         | 42                |
| BH700-10                                                           | 2         | 91.68                         | 43                |
| $\gamma$ -Fe <sub>2</sub> O <sub>3</sub> @C@UiO-66-NH <sub>2</sub> | 7         | 208.6                         | 44                |
| MIM-MMT                                                            | 2         | 2.29                          | 45                |
| MC3                                                                | 2         | 201.2                         | 46                |
| CS/Gel-0.1GN                                                       | 3         | 72.2                          | 47                |
| Bent-PMETAC                                                        | 7         | 48.12                         | 48                |
| CTS-MS                                                             | 3         | 712                           | This study        |

**Table S3** Kinetics model correlation coefficient for OII adsorption on CTS-MS composite at different temperatures.

| <i>T/K</i> | <b>Correlation coefficient (<math>R^2</math>)</b> |                  |                             |
|------------|---------------------------------------------------|------------------|-----------------------------|
|            | <b>PFO model</b>                                  | <b>PSO model</b> | <b>Intra-particle model</b> |
| 277.15     | 0.925                                             | 0.994            | 0.913                       |
| 293.15     | 0.925                                             | 0.995            | 0.910                       |
| 303.15     | 0.950                                             | 0.999            | 0.837                       |
| 313.15     | 0.978                                             | 0.999            | 0.640                       |

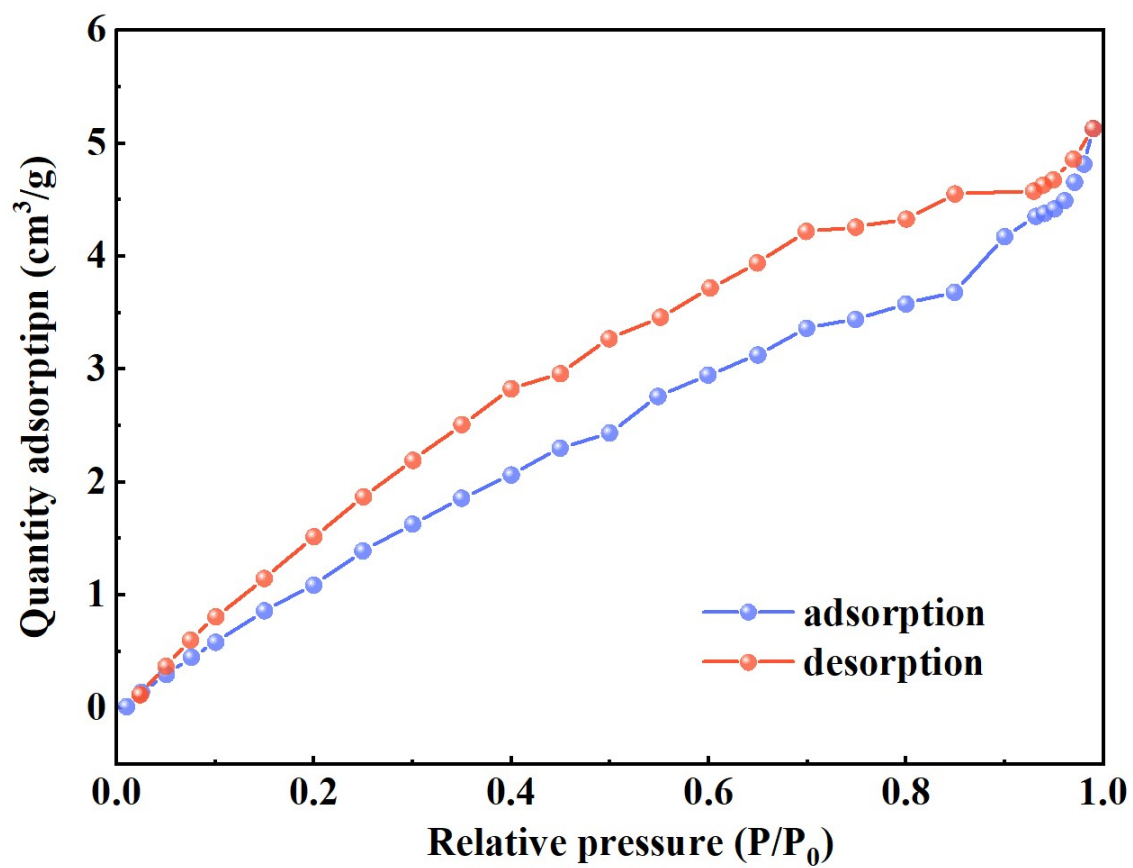

Fig. S1. Nitrogen adsorption-desorption isotherms of MS.

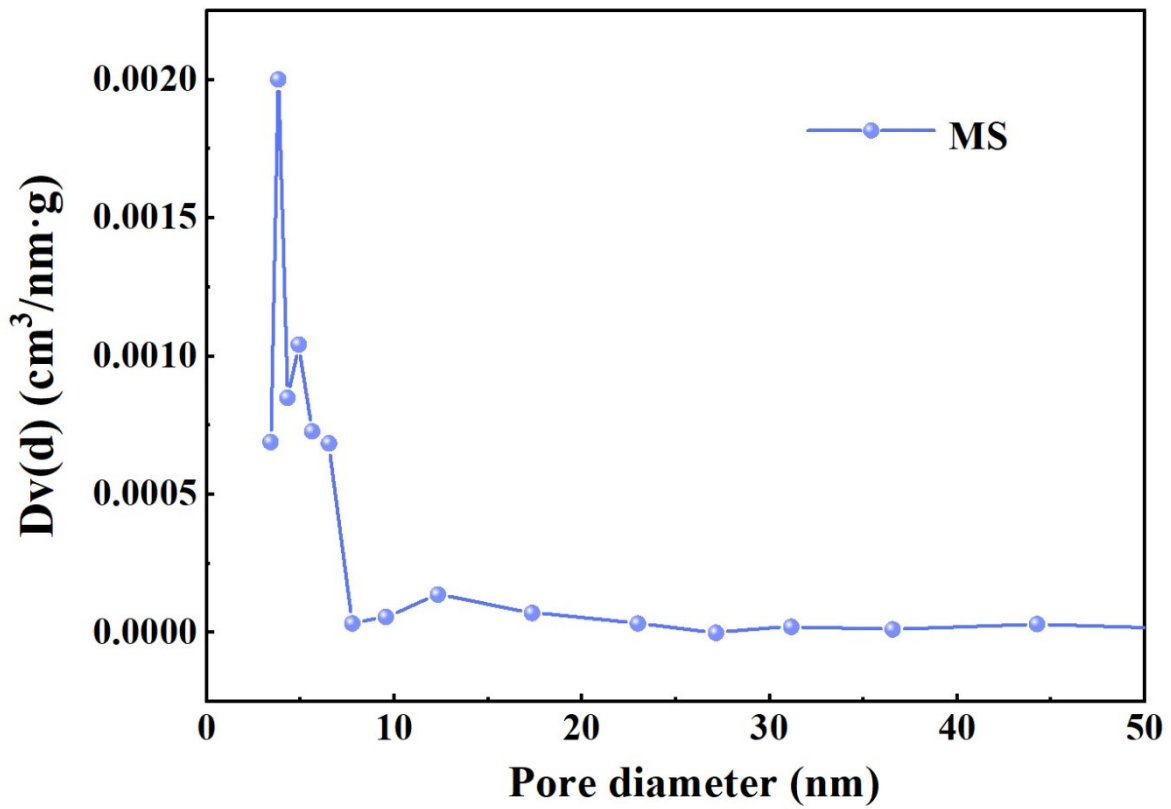

Fig. S2. BJH pore size distribution of MS.

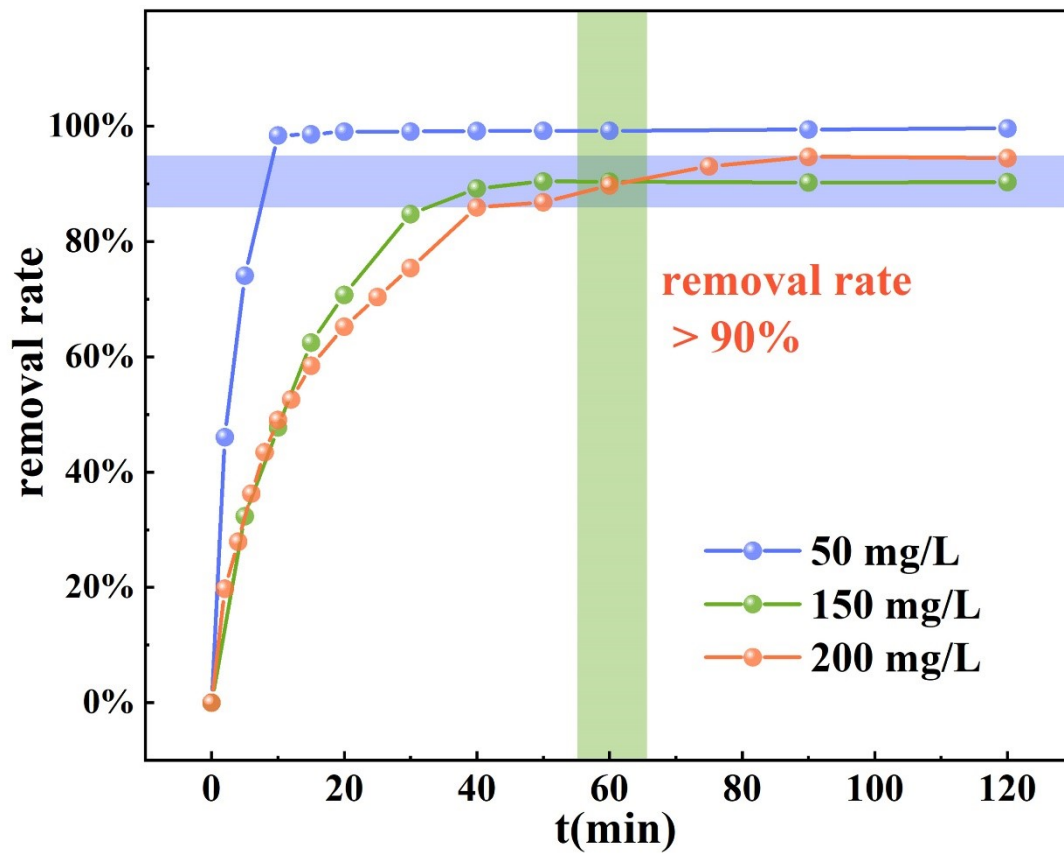

Fig. S3. Effect of contact time on adsorption of different concentrations of OII by CTS-MS composite.

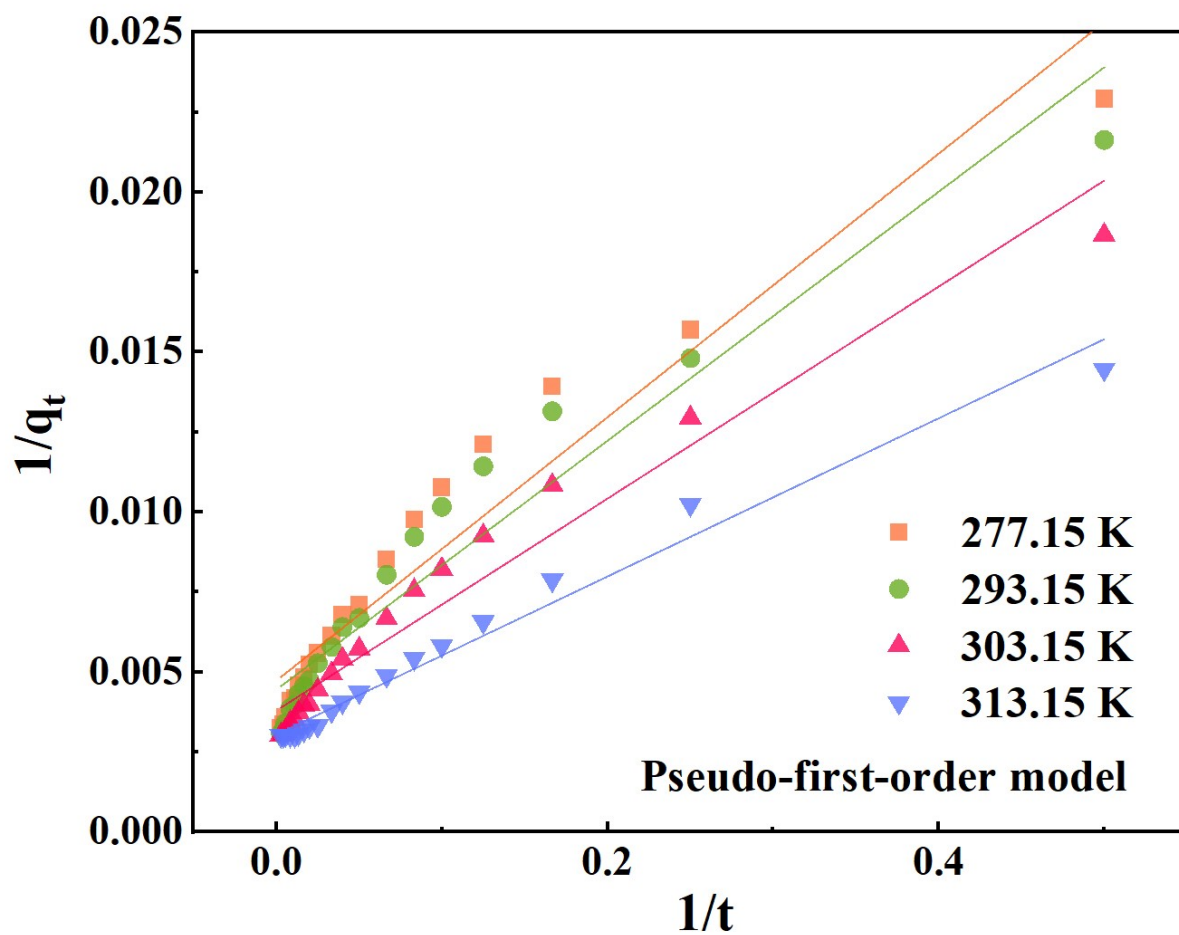

Fig. S4. The pseudo-first-order kinetics linear fitting under different temperature conditions (220 mg/L; 100 mL; pH 3; 58 mg dosage; 360 min).



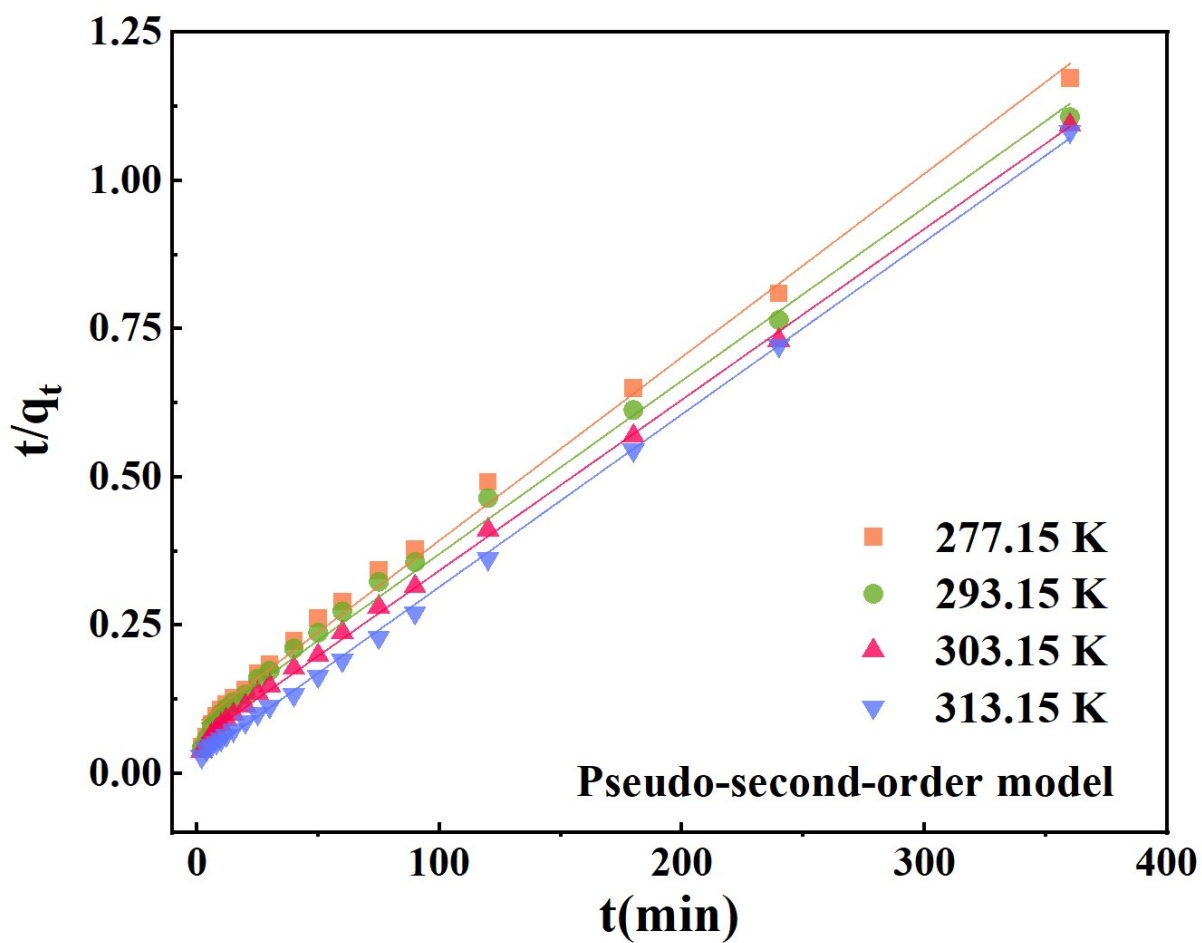

Fig. S5. The pseudo-second-order kinetics linear fitting under different temperature conditions (220 mg/L; 100 mL; pH 3; 58 mg dosage; 360 min).

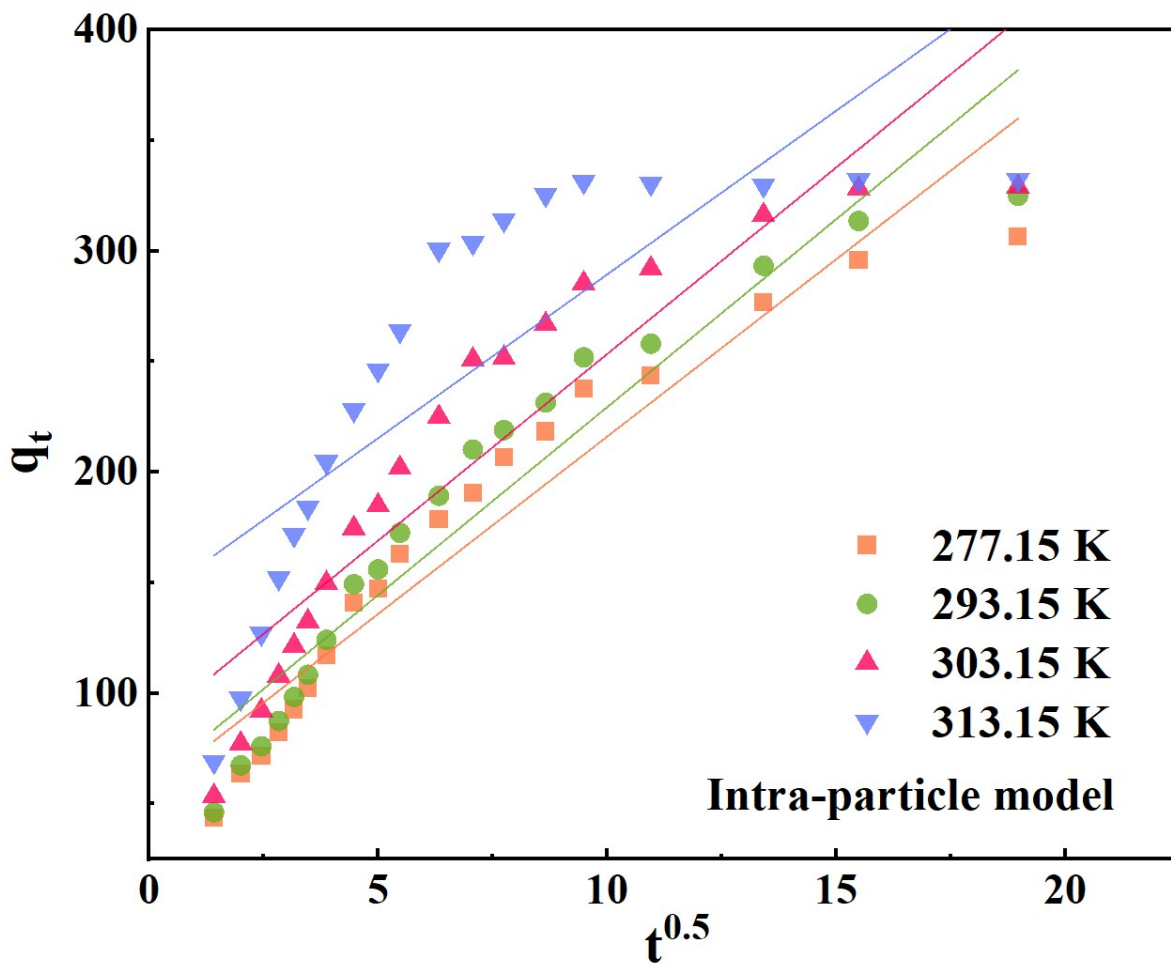

**Fig. S6.** The intra-particle kinetics linear fitting under different temperature conditions (220 mg/L; 100 mL; pH 3; 58 mg dosage; 360 min).
